# Supplementary material for: Lung metastases share common immune features regardless of primary tumor origin
Source: PubMed Central journal article supplement — J Immunother Cancer. 2020 Jun 25;8(1):e000491. doi: 10.1136/jitc-2019-000491 (PMC7319789; doi:10.1136/jitc-2019-000491), 2020-06-25
Supplement: jitc-2019-000491supp001.pdf [file jitc-2019-000491supp001.pdf]

| GEO dataset | Sample Type | Cancer type                                                                                | Met site                                              | N   | Microarray Platform       | Normalization             |
|-------------|-------------|--------------------------------------------------------------------------------------------|-------------------------------------------------------|-----|---------------------------|---------------------------|
| GSE100534   | Metastatic  | Breast                                                                                     | Brain                                                 | 3   | HG 1.0 ST Array           | Affymetrix                |
| GSE101607   | Metastatic  | Prostate(88.9%), NSCLC (1.8%), kidney(5.6%), colorectal(3.7%)                              | Bone                                                  | 54  | Illumina Human HT-12 V4.0 | GenomeStudio cubic spline |
| GSE10961    | Metastatic  | Colorectal                                                                                 | Liver                                                 | 18  | HG U133 Plus 2            | MASS.0                    |
| GSE44660    | Metastatic  | Melanoma                                                                                   | Brain                                                 | 7   | Human Exon 1.0 ST         | RMA                       |
| GSE11078    | Metastatic  | Breast                                                                                     | Lung                                                  | 5   | HG U133 Plus 2            | RMA                       |
| GSE12630    | Metastatic  | Breast (13.6%), kidney (27.2%), colorectal (13.6%), prostate (4.5%), skin melanoma (40.9%) | Lung(72.7%), liver(27.3%)                             | 22  | HG U133A                  | Pathwork standardization  |
| GSE14017    | Metastatic  | Breast                                                                                     | Lung(13.8%), brain(51.7%), bone(34.5%)                | 29  | HG U133 Plus 2            | RMA                       |
| GSE14018    | Metastatic  | Breast                                                                                     | Lung(44.4%), brain(19.44%), bone(22.2%), liver(13.9%) | 36  | HG U133A                  | RMA                       |
| GSE43837    | Metastatic  | Breast                                                                                     | Brain                                                 | 19  | HG U133 X3P               | MASS.0                    |
| GSE46141    | Metastatic  | Breast                                                                                     | Lung(8.7%), liver(69.6%), bone(21.74%)                | 23  | HuRSTA 2.0                | QC-RMA                    |
| GSE14108.1  | Metastatic  | NSCLC                                                                                      | Brain                                                 | 19  | HG U133 Plus 2            | RMA                       |
| GSE14108.2  | Metastatic  | NSCLC                                                                                      | Brain                                                 | 9   | HG U133A                  | RMA                       |
| GSE40367    | Metastatic  | Colorectal                                                                                 | Liver                                                 | 7   | HG U133 Plus 2            | RMA                       |
| GSE41258    | Metastatic  | Colorectal                                                                                 | Lung(29.9%), liver(70.2%)                             | 67  | HG U133A                  | PLIER algorithm           |
| GSE50496.1  | Metastatic  | Melanoma                                                                                   | Lung(15%), brain(72.5%), bone(7.5%), liver(5%)        | 40  | HuRSTA 2.0                | Quantile normalization    |
| GSE85258    | Metastatic  | Kidney                                                                                     | Lung                                                  | 16  | HG U133 Plus 2            | RMA                       |
| TOTAL       | Metastatic  | Breast(31.6%), colorectal(26%), Kidney(6.7%), NSCLC(7.8%), Prostate(13%), Skin(15%)        | Bone(21.4%), Brain(28.9%), Liver(27%), Lung(22.7%)    | 374 |                           |                           |

**Supplementary Table 1.** Public datasets containing gene expression data on metastatic human samples.

| GEO dataset | Sample Type | Tissue site                                                 | - | N   | Microarray Platform | Normalization |
|-------------|-------------|-------------------------------------------------------------|---|-----|---------------------|---------------|
| GSE7307     | Normal      | Brain(56.25%),<br>Lung(18.75%),<br>Liver(25%)               |   | 16  | HG U133 Plus<br>2   | RMA           |
| GSE45878    | Normal      | Brain(73.3%),<br>Lung(26.7%)                                |   | 281 | HuGene 11<br>stv1   | RMA           |
| GSE803      | Normal      | Bone(25%),<br>Brain(25%),<br>Liver(25%),<br>Lung(25%)       |   | 8   | HG U133 Plus<br>2   | RMA           |
| GSE3526     | Normal      | Bone(23.8%),<br>Brain(42.9%),<br>Liver(19%),<br>Lung(14.3%) |   | 21  | HG U133 Plus<br>2   | RMA           |
| GSE1133     | Normal      | Bone(45.5%),<br>Brain(36.3%),<br>Liver(9%),<br>Lung(9%)     |   | 22  | HG U133A            | MAS5.0        |
| TOTAL       | Normal      | Bone(4.9%),<br>Brain(67.2%),<br>Liver(3.5%),<br>Lung(24.4%) |   | 348 |                     |               |

**Supplementary Table 2.** Public datasets containing gene expression data on normal tissues.

| Gene set                              | MsigDB/Reference                                                                            | Genes (in expression matrix) |
|---------------------------------------|---------------------------------------------------------------------------------------------|------------------------------|
| IFN Gamma                             | REACTOME_INTERFERON_GAMMA_SIGNALING                                                         | 38                           |
| Antigen processing and presentation   | KEGG_ANTIGEN_PROCESSING_AND_PRESENTATION                                                    | 46                           |
| CTLA4 Signalling                      | BIOCARTA_CTLA4_PATHWAY                                                                      | 17                           |
| PDL1 Signalling                       | REACTOME_PD1_SIGNALING                                                                      | 10                           |
| Inflammatory response Up              | GO_POSITIVE_REGULATION_OF_INFLAMMATORY_RESPONSE                                             | 68                           |
| Leukocyte migration                   | GO_LEUKOCYTE_MIGRATION_INVOLVED_IN_INFLAMMATORY_RESPONSE                                    | 10                           |
| Acute inflammatory response Up        | GO_POSITIVE_REGULATION_OF_ACUTE_INFLAMMATORY_RESPONSE                                       | 19                           |
| Chronic inflammatory response Up      | GO_REGULATION_OF_CHRONIC_INFLAMMATORY_RESPONSE                                              | 6                            |
| Regulation of cytokine production     | GO_REGULATION_OF_CYTOKINE_PRODUCTION_INVOLVED_IN_INFLAMMATORY                               | 9                            |
| JAK/STAT signalling                   | HALLMARK_IL6_JAK_STAT3_SIGNALING                                                            | 70                           |
| IFN Alpha                             | HALLMARK_INTERFERON_ALPHA_RESPONSE                                                          | 65                           |
| Adaptive immune response              | GO_ADAPTIVE_IMMUNE_RESPONSE                                                                 | 140                          |
| Cytokine production                   | GO_CYTOKINE_PRODUCTION_INVOLVED_IN_IMMUNE_RESPONSE                                          | 11                           |
| Macrophage activation                 | GO_MACROPHAGE_ACTIVATION_INVOLVED_IN_IMMUNE_RESPONSE                                        | 9                            |
| Mastocytes activation                 | GO_MAST_CELL_MEDIATED_IMMUNITY                                                              | 14                           |
| Myeloid cells activation              | GO_MYELOID_CELL_ACTIVATION_INVOLVED_IN_IMMUNE_RESPONSE                                      | 32                           |
| Natural killers mediated immunity     | GO_NATURAL_KILLER_CELL_MEDIATED_IMMUNITY                                                    | 13                           |
| Cytokines production Immune response  | GO_POSITIVE_REGULATION_OF_CYTOKINE_PRODUCTION_INVOLVED_IN_IMMUNE_RESPONSE                   | 18                           |
| Myeloid leukocyte cytokines Immune    | GO_POSITIVE_REGULATION_OF_MYELOID_LEUKOCYTE_CYTOKINE_PRODUCTION_INVOLVED_IN_IMMUNE_RESPONSE | 6                            |
| Regulation of Thelp 1 Immune respons  | GO_POSITIVE_REGULATION_OF_T_HELPER_1_TYPE_IMMUNE_RESPONSE                                   | 10                           |
| "Regulation of Type 2 Immune Response | GO_POSITIVE_REGULATION_OF_TYPE_2_IMMUNE_RESPONSE                                            | 10                           |
| T cell medidated Immunity             | GO_T_CELL_MEDIATED_IMMUNITY                                                                 | 16                           |
| Tolerance Induction                   | GO_TOLERANCE_INDUCTION                                                                      | 5                            |
| Immunoscore signature                 | Galon J et al., 2013 Jul 25;39(1):11-26. doi: 10.1016/j.immuni.2013.07.008.                 | 11                           |
| MHC class II                          | Manually selected genes                                                                     | 4                            |

**Supplementary Table 3.** Gene sets used to make the cluster analysis.

| Cell type                            | Subtype              | MCPcounter (RELATIVE) | xCell (RELATIVE) | QuanTiseq (ABSOLUTE) | Total |
|--------------------------------------|----------------------|-----------------------|------------------|----------------------|-------|
| T regulatory cells                   |                      | -                     | 0.89             | 0.77                 | 0     |
| T cells                              |                      | 0.04(Bo)              | -                | -                    | 1     |
| CD4+ T cells                         | T CD4 memory         | -                     | 0.12             | 0.23                 | 0     |
|                                      | T CD4 naive          |                       | 0.31             |                      | 0     |
|                                      | T CD4 non regulatory |                       | 0.57             |                      | 0     |
| CD8+ T cells                         |                      | 0.001(Bo,Br,Lv)       | 0.27             | 0.0003(Bo, Lv)       | 2     |
| B cells                              |                      | <0.001(Bo,Br,Lv)      | 0.55             | 0.006(Lv)            | 2     |
| NK cells                             |                      | 0.69                  | 0.21             | 0.43                 | 0     |
| Macrophages                          | Macrophages M1       | 0.32                  | 0.08(Br)         | 0.11                 | 0     |
|                                      | Macrophages M2       |                       | 0.16             | 0.28                 |       |
| Monocytes                            |                      | 0.32                  | 0.21             | 0.008(Lv)            | 1     |
| Dendritic cells                      |                      | 0.004(Bo,Br,Lv)       | <0.001(Br,Bo,Lv) | 0.42                 | 2     |
| Neutrophils                          |                      | 0.47                  | 0.47             | 0.45                 | 0     |
| Endothelial cells                    |                      | 0.006(Lv)             | <0.001(Br,Bo,Lv) | -                    | 2     |
| Cancer Associated Fibroblasts (CAFs) |                      | <0.001(Br,Lv)         | 0.12             | -                    | 1     |

Kruskal-Wallis rank sum test p-val (Lung Step-wise test p-val < 0.05).

**Supplementary Table 4.** Immune cell infiltration validation. Values indicate the Kruskal-Wallis rank sum test p-value between the four metastatic sites. Sites in parentheses indicate Lung vs Site Step-wise test p-val <0.05. Bo:bone, Br:brain, Lv:liver, Lu:lung.

| NAME                                       | SIZE | ES   | NES  | NOM p-val | FDR q-val | FWER p-val | RANK AT MAX |
|--------------------------------------------|------|------|------|-----------|-----------|------------|-------------|
| HALLMARK_IL2_STAT5_SIGNALING               | 145  | 0.65 | 1.82 | 0.00      | 0.15      | 0.07       | 1575        |
| HALLMARK_APOPTOSIS                         | 141  | 0.62 | 1.81 | 0.00      | 0.09      | 0.07       | 1708        |
| HALLMARK_INFLAMMATORY_RESPONSE             | 158  | 0.76 | 1.79 | 0.00      | 0.06      | 0.08       | 1363        |
| HALLMARK_ALLOGRAFT_REJECTION               | 151  | 0.82 | 1.78 | 0.00      | 0.05      | 0.09       | 948         |
| HALLMARK_COMPLEMENT                        | 150  | 0.70 | 1.77 | 0.00      | 0.05      | 0.09       | 1351        |
| HALLMARK_INTERFERON_GAMMA_RESPONSE         | 147  | 0.80 | 1.75 | 0.00      | 0.05      | 0.11       | 1330        |
| HALLMARK_TNFA_SIGNALING_VIA_NFKB           | 164  | 0.71 | 1.73 | 0.00      | 0.05      | 0.13       | 1584        |
| HALLMARK_IL6_JAK_STAT3_SIGNALING           | 70   | 0.76 | 1.72 | 0.00      | 0.04      | 0.13       | 1343        |
| HALLMARK_KRAS_SIGNALING_UP                 | 158  | 0.69 | 1.72 | 0.00      | 0.04      | 0.14       | 1331        |
| HALLMARK_INTERFERON_ALPHA_RESPONSE         | 65   | 0.80 | 1.69 | 0.00      | 0.05      | 0.18       | 1288        |
| HALLMARK_EPITHELIAL_MESENCHYMAL_TRANSITION | 174  | 0.75 | 1.62 | 0.01      | 0.07      | 0.27       | 1575        |
| HALLMARK_COAGULATION                       | 109  | 0.67 | 1.61 | 0.01      | 0.07      | 0.30       | 1489        |
| HALLMARK_HYPOXIA                           | 158  | 0.54 | 1.60 | 0.02      | 0.07      | 0.31       | 1741        |
| HALLMARK_UV_RESPONSE_UP                    | 132  | 0.44 | 1.59 | 0.01      | 0.07      | 0.33       | 1627        |
| HALLMARK_APICAL_JUNCTION                   | 145  | 0.50 | 1.55 | 0.03      | 0.09      | 0.42       | 1368        |
| HALLMARK_REACTIVE_OXIGEN_SPECIES_PATHWAY   | 39   | 0.47 | 1.52 | 0.05      | 0.11      | 0.48       | 2089        |
| HALLMARK_ANGIOGENESIS                      | 27   | 0.70 | 1.51 | 0.03      | 0.10      | 0.49       | 1716        |
| HALLMARK_ADIPOGENESIS                      | 153  | 0.39 | 1.49 | 0.04      | 0.11      | 0.52       | 1319        |
| HALLMARK_MYOGENESIS                        | 150  | 0.47 | 1.47 | 0.03      | 0.12      | 0.55       | 1949        |
| HALLMARK_P53_PATHWAY                       | 166  | 0.39 | 1.46 | 0.03      | 0.12      | 0.57       | 2018        |
| HALLMARK_APICAL_SURFACE                    | 28   | 0.56 | 1.44 | 0.05      | 0.13      | 0.60       | 1414        |
| HALLMARK_UV_RESPONSE_DN                    | 112  | 0.47 | 1.43 | 0.05      | 0.13      | 0.63       | 1799        |
| HALLMARK_TGF_BETA_SIGNALING                | 42   | 0.45 | 1.33 | 0.12      | 0.23      | 0.81       | 2060        |
| HALLMARK_XENOBIOTIC_METABOLISM             | 155  | 0.50 | 1.30 | 0.19      | 0.25      | 0.84       | 1929        |
| HALLMARK_NOTCH_SIGNALING                   | 23   | 0.47 | 1.30 | 0.17      | 0.24      | 0.85       | 2423        |
| HALLMARK_HEME_METABOLISM                   | 153  | 0.32 | 1.28 | 0.13      | 0.25      | 0.86       | 1875        |
| HALLMARK_MTORC1_SIGNALING                  | 171  | 0.29 | 1.05 | 0.39      | 0.54      | 0.99       | 652         |
| HALLMARK_KRAS_SIGNALING_DN                 | 103  | 0.33 | 1.04 | 0.37      | 0.54      | 0.99       | 1561        |
| HALLMARK_FATTY_ACID_METABOLISM             | 127  | 0.29 | 1.01 | 0.44      | 0.57      | 0.99       | 1439        |
| HALLMARK_BILE_ACID_METABOLISM              | 83   | 0.36 | 1.00 | 0.47      | 0.56      | 0.99       | 2125        |
| HALLMARK_PI3K_AKT_MTOR_SIGNALING           | 81   | 0.23 | 1.00 | 0.46      | 0.55      | 0.99       | 2239        |
| HALLMARK_ESTROGEN_RESPONSE_EARLY           | 165  | 0.30 | 0.93 | 0.57      | 0.63      | 1.00       | 1933        |
| HALLMARK_HEDGEHOG_SIGNALING                | 27   | 0.34 | 0.92 | 0.59      | 0.64      | 1.00       | 2091        |
| HALLMARK_ESTROGEN_RESPONSE_LATE            | 172  | 0.28 | 0.90 | 0.64      | 0.64      | 1.00       | 1885        |
| HALLMARK_GLYCOLYSIS                        | 153  | 0.25 | 0.90 | 0.61      | 0.63      | 1.00       | 2270        |
| HALLMARK_ANDROGEN_RESPONSE                 | 91   | 0.25 | 0.84 | 0.68      | 0.70      | 1.00       | 1504        |
| HALLMARK_WNT_BETA_CATENIN_SIGNALING        | 32   | 0.24 | 0.72 | 0.87      | 0.86      | 1.00       | 1770        |
| HALLMARK_PROTEIN_SECRETION                 | 85   | 0.15 | 0.61 | 0.95      | 0.95      | 1.00       | 1878        |
| HALLMARK_CHOLESTEROL_HOMEOSTASIS           | 52   | 0.19 | 0.60 | 0.97      | 0.93      | 1.00       | 2122        |

**Supplementary Table 5.** Functional enrichment in HIC metastases (GSEA Hallmarks).

| Gene     | logFC | AveExpr | t     | P.Value  | adj.P.Val | B     |
|----------|-------|---------|-------|----------|-----------|-------|
| HLA-DMA  | 2.02  | 8.39    | 19.77 | 1.85E-42 | 1.45E-38  | 86.07 |
| GZMA     | 2.10  | 6.04    | 19.71 | 2.62E-42 | 2.06E-38  | 85.73 |
| HLA-DPA1 | 2.61  | 8.37    | 19.47 | 9.31E-42 | 7.31E-38  | 84.47 |
| ITGB2    | 2.17  | 8.45    | 18.70 | 5.47E-40 | 4.29E-36  | 80.44 |
| CD74     | 2.38  | 9.63    | 18.55 | 1.25E-39 | 9.80E-36  | 79.62 |
| CCL5     | 2.43  | 6.94    | 18.44 | 2.29E-39 | 1.80E-35  | 79.02 |
| LAPTM5   | 2.21  | 8.82    | 17.81 | 7.15E-38 | 5.61E-34  | 75.61 |
| HLA-DPB1 | 2.25  | 7.87    | 17.75 | 9.74E-38 | 7.64E-34  | 75.30 |
| EVI2B    | 2.06  | 6.55    | 17.14 | 2.92E-36 | 2.29E-32  | 71.93 |
| TYROBP   | 2.12  | 8.24    | 17.09 | 3.85E-36 | 3.02E-32  | 71.66 |
| HLA-DRA  | 3.03  | 9.18    | 17.06 | 4.57E-36 | 3.59E-32  | 71.49 |
| IL7R     | 2.41  | 6.53    | 17.03 | 5.41E-36 | 4.25E-32  | 71.32 |
| FCER1G   | 2.01  | 8.04    | 16.58 | 6.76E-35 | 5.31E-31  | 68.82 |
| AIF1     | 2.42  | 7.28    | 16.55 | 7.72E-35 | 6.06E-31  | 68.69 |
| C1QA     | 2.04  | 7.70    | 16.54 | 8.19E-35 | 6.43E-31  | 68.63 |
| GZMK     | 2.01  | 6.28    | 16.37 | 2.14E-34 | 1.68E-30  | 67.67 |
| CD69     | 2.32  | 5.64    | 16.37 | 2.16E-34 | 1.69E-30  | 67.66 |
| SLAMF8   | 2.04  | 5.88    | 16.26 | 4.06E-34 | 3.18E-30  | 67.04 |
| MS4A6A   | 2.29  | 7.68    | 16.13 | 8.25E-34 | 6.48E-30  | 66.33 |
| FGL2     | 2.36  | 6.76    | 16.09 | 1.06E-33 | 8.36E-30  | 66.08 |
| C1QB     | 2.31  | 8.34    | 16.02 | 1.58E-33 | 1.24E-29  | 65.69 |
| PTPRC    | 2.22  | 6.47    | 15.61 | 1.63E-32 | 1.28E-28  | 63.37 |
| CD14     | 2.19  | 8.41    | 15.43 | 4.63E-32 | 3.64E-28  | 62.34 |
| SAMSN1   | 2.06  | 5.85    | 15.14 | 2.50E-31 | 1.96E-27  | 60.67 |
| TRIM22   | 2.06  | 7.59    | 15.03 | 4.75E-31 | 3.73E-27  | 60.03 |
| SRGN     | 2.17  | 8.83    | 14.70 | 3.15E-30 | 2.48E-26  | 58.15 |
| HLA-DRB1 | 2.32  | 8.81    | 14.44 | 1.44E-29 | 1.13E-25  | 56.64 |
| MS4A4A   | 2.08  | 6.20    | 13.89 | 3.58E-28 | 2.81E-24  | 53.45 |
| GBP1     | 2.35  | 6.96    | 13.36 | 8.36E-27 | 6.56E-23  | 50.32 |
| CXCL9    | 2.25  | 6.66    | 13.11 | 3.72E-26 | 2.92E-22  | 48.84 |
| CD52     | 2.03  | 6.75    | 13.08 | 4.28E-26 | 3.36E-22  | 48.70 |
| CXCL10   | 2.36  | 7.20    | 12.83 | 1.99E-25 | 1.56E-21  | 47.18 |
| SERPING1 | 2.01  | 8.41    | 12.26 | 5.89E-24 | 4.62E-20  | 43.82 |
| LYZ      | 2.61  | 7.70    | 11.97 | 3.29E-23 | 2.58E-19  | 42.11 |
| RARRES3  | 2.14  | 8.08    | 11.79 | 9.43E-23 | 7.40E-19  | 41.06 |
| CD163    | 2.16  | 7.66    | 11.66 | 2.03E-22 | 1.59E-18  | 40.30 |
| IGJ      | 2.71  | 6.11    | 10.66 | 8.02E-20 | 6.29E-16  | 34.37 |
| C1S      | 2.31  | 8.17    | 10.15 | 1.62E-18 | 1.27E-14  | 31.39 |
| S100A8   | 2.38  | 7.91    | 9.86  | 9.45E-18 | 7.42E-14  | 29.65 |
| MXRA5    | 2.09  | 8.14    | 9.34  | 1.96E-16 | 1.54E-12  | 26.64 |
| S100A9   | 2.07  | 7.58    | 9.22  | 3.97E-16 | 3.12E-12  | 25.94 |
| CXCL13   | 2.24  | 5.86    | 8.44  | 3.54E-14 | 2.77E-10  | 21.51 |
| MMP1     | 2.10  | 5.53    | 7.52  | 5.83E-12 | 4.57E-08  | 16.47 |

**Supplementary Table 6.** List of 43 differentially expressed genes (DEG) between HIC and LIC that passed filters  $\log_2FC > \text{abs}(2)$  and  $p\text{-val} < 0.01$ .
